# Supplementary material for: A structure and reactivity analysis of monomeric Ni(ii)–hydroxo complexes prepared from water
Source: Royal Society of Chemistry journal article supplement (doi:10.1039/b820209e), 2009-01-01
Supplement: b820209e.pdf [file b820209e.pdf]

## Supporting Information for

### A Structure and Reactivity Analysis of Monomeric Ni(II)—Hydroxo Complexes

#### Prepared from Water

Darla Powell-Jia, Joseph W. Ziller, and A. S. Borovik\*

Department of Chemistry, University of California-Irvine, 1102 Natural Science II,

Irvine, CA 92697

**Table S1.** Crystallographic Data for  $\text{K}[\text{Ni}^{\text{II}}\text{H}_2\mathbf{1}^{\text{Bu}'}(\text{OH})]$  and  $[\text{NMe}_4][\text{Ni}^{\text{II}}\text{H}_2\mathbf{1}^{\text{iPr}}(\text{OH})]$

| Salt                                         | $\text{K}[\text{Ni}^{\text{II}}\text{H}_2\mathbf{1}^{\text{Bu}'}(\text{OH})]\cdot\text{DMA}$ | $[\text{NMe}_4][\text{Ni}^{\text{II}}\text{H}_2\mathbf{1}^{\text{iPr}}(\text{OH})]$ | $[\text{NMe}_4][\text{Ni}^{\text{II}}\text{H}_2\mathbf{1}^{\text{iPr}}(\text{OBu}^t)]$ |
|----------------------------------------------|----------------------------------------------------------------------------------------------|-------------------------------------------------------------------------------------|----------------------------------------------------------------------------------------|
| Molecular formula                            | $\text{C}_{13}\text{H}_{28}\text{KN}_5\text{NiO}_3$                                          |                                                                                     | $\text{C}_{21}\text{H}_{48}\text{N}_6\text{NiO}_3$                                     |
| Formula weight (g/mol)                       | 400.12                                                                                       |                                                                                     | 491.36                                                                                 |
| <i>T</i> (K)                                 | 163(2)                                                                                       |                                                                                     | 148(2)                                                                                 |
| Space group                                  | <i>P</i> -1                                                                                  |                                                                                     | <i>P</i> 4 <sub>3</sub> 2 <sub>1</sub> 2                                               |
| <i>a</i> (Å)                                 | 9.6492(9)                                                                                    |                                                                                     | 17.6716(10)                                                                            |
| <i>b</i> (Å)                                 | 9.8057(9)                                                                                    |                                                                                     | 17.6716(10)                                                                            |
| <i>c</i> (Å)                                 | 10.2370(9)                                                                                   |                                                                                     | 21.525(3)                                                                              |
| $\alpha$ (deg)                               | 86.824(2)                                                                                    |                                                                                     | 90                                                                                     |
| $\beta$ (deg)                                | 88.467(2)                                                                                    |                                                                                     | 90                                                                                     |
| $\gamma$ (deg)                               | 74.471(2)                                                                                    |                                                                                     | 90                                                                                     |
| <i>Z</i>                                     | 2                                                                                            |                                                                                     | 8                                                                                      |
| <i>V</i> (Å <sup>3</sup> )                   | 931.73(15)                                                                                   |                                                                                     | 6722.1(9)                                                                              |
| $\delta_{\text{calcd}}$ (Mg/m <sup>3</sup> ) | 1.427                                                                                        |                                                                                     | 0.971                                                                                  |
| <i>R</i> 1 <sup>a</sup>                      | 0.0286                                                                                       |                                                                                     | 0.0996                                                                                 |
| w <i>R</i> 2 <sup>b</sup>                    | 0.716                                                                                        |                                                                                     | 0.3029                                                                                 |
| GOF <sup>c</sup>                             | 1.050                                                                                        |                                                                                     | 1.471                                                                                  |

<sup>a</sup> $R1 = \sum ||F_o| - |F_c|| / \sum |F_o|$ . <sup>b</sup> $wR2 = [\sum [\omega(F_o^2 - F_c^2)^2] / \sum [\omega(F_o^2)^2]]^{1/2}$ . <sup>c</sup> $GOF = [\sum [\omega(F_o^2 - F_c^2)^2] / (n-p)]^{1/2}$  where *n* is the number of reflections and *p* is the total number of parameters refined.

**Table S2.** Selected Metrical Parameters for the  $\text{K}[\text{Ni}^{\text{II}}\text{H}_2\mathbf{1}^{\text{Bu}'}(\text{OH})]$ ,  $[\text{NMe}_4][\text{Ni}^{\text{II}}\text{H}_2\mathbf{1}^{\text{iPr}}(\text{OH})]$ , and  $[\text{NMe}_4][\text{Ni}^{\text{II}}\text{H}_2\mathbf{1}^{\text{iPr}}(\text{OBu}')]$ .

| Complex              | $[\text{Ni}^{\text{II}}\text{H}_2\mathbf{1}^{\text{Bu}'}(\text{OH})]^-$ | $[\text{Ni}^{\text{II}}\text{H}_2\mathbf{1}^{\text{iPr}}(\text{OH})]^-$ | $[\text{Ni}^{\text{II}}\text{H}_2\mathbf{1}^{\text{iPr}}(\text{OBu}')]^-$ |
|----------------------|-------------------------------------------------------------------------|-------------------------------------------------------------------------|---------------------------------------------------------------------------|
| <u>Distances (Å)</u> |                                                                         |                                                                         |                                                                           |
| Ni—O1                | 1.857(1)                                                                |                                                                         | 1.874(4)                                                                  |
| Ni—N1                | 1.928(1)                                                                |                                                                         | 1.907(6)                                                                  |
| Ni—N2                | 1.917(1)                                                                |                                                                         | 1.914(5)                                                                  |
| Ni—N3                | 1.914(2)                                                                |                                                                         | 1.925(5)                                                                  |
| O1⋯N4                | 2.649(2)                                                                |                                                                         | 2.746(8)                                                                  |
| O1⋯N5                | 2.757(2)                                                                |                                                                         | 2.714(7)                                                                  |
| O1⋯K1                | 3.251(2)                                                                |                                                                         | —                                                                         |
| <u>Angles (°)</u>    |                                                                         |                                                                         |                                                                           |
| N1—Ni—O1             | 172.49(6)                                                               |                                                                         | 172.8(3)                                                                  |
| N1—Ni—N2             | 86.21(6)                                                                |                                                                         | 84.1(2)                                                                   |
| N1—Ni—N3             | 84.71(6)                                                                |                                                                         | 85.0(2)                                                                   |
| N2—Ni—N3             | 168.91(6)                                                               |                                                                         | 166.9(2)                                                                  |
| N2—Ni—O1             | 94.59(6)                                                                |                                                                         | 95.8(2)                                                                   |
| N3—Ni—O1             | 95.24(6)                                                                |                                                                         | 95.9(2)                                                                   |
